# Supplementary material for: Basal-type lumenogenesis in extraembryonic endoderm stem cells models the early visceral endoderm
Source: Oxford University Press journal article supplement (doi:10.1242/jcs.230607), 2019-09-06
Supplement: jcs230607supp.pdf [file jcs230607supp.pdf]

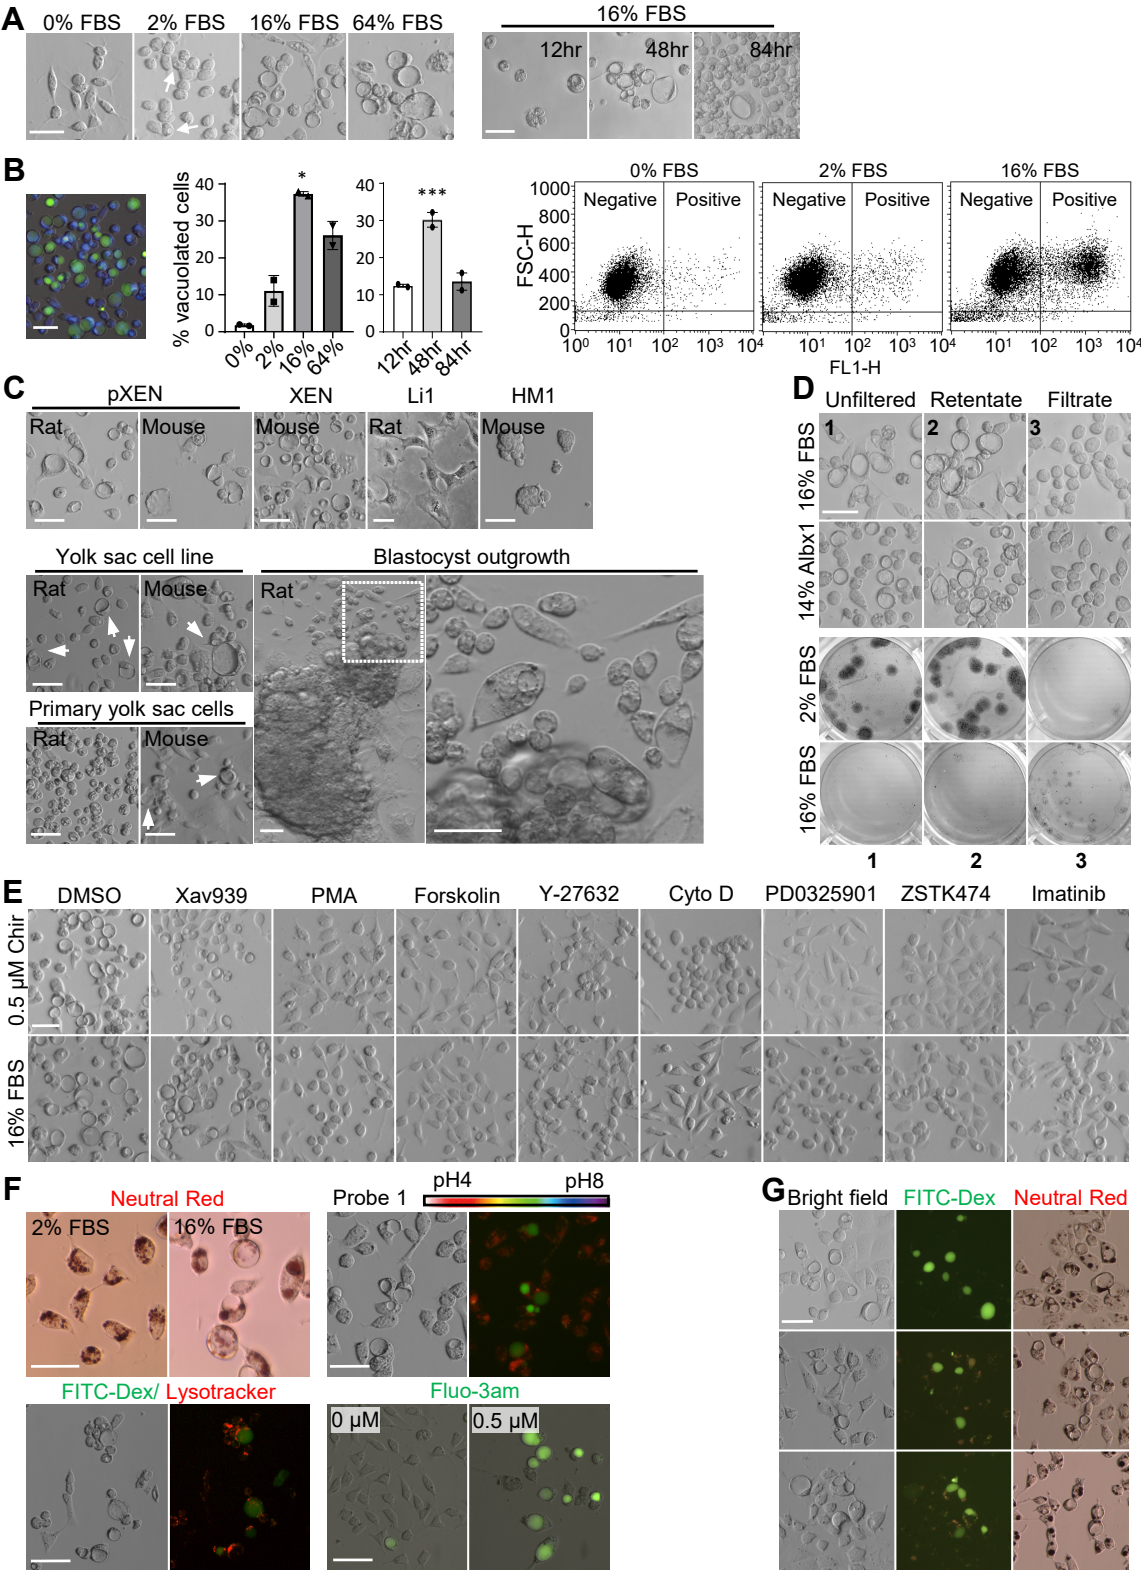

**Fig. S1. Additional characterization of vacuoles and vacuolization factors. (A)** Effects of serum concentration and culture time/cell density. Left row: Rat pXEN cells (line CX1) were cultured for 2 days in different concentrations of FBS (final concentrations: 2%, 16%, 64%); arrows indicate smaller vacuoles. Right row: Cells were cultured in 16% FBS for the indicated time points. **(B)** The proportion of vacuolated cells was quantified by flow cytometry after AP staining on Day 2. The photo illustrates the specificity of the AP dye (green: AP dye; blue: DAPI). Columns show mean  $\pm$  s.e.m. from two independent experiments (n=2), each performed in duplicate. \*,  $p < 0.05$ ; \*\*\*,  $p < 0.001$  (left columns: versus 2% FBS ("ground state"); right columns: versus 12 hours) by two-tailed Student's t-test. The plots show representative flow cytometry patterns. **(C)** Comparison of cell types for the propensity to vacuolate. Vacuolization tendency appeared to decrease in the order: blastocyst outgrowths > pXEN cells > XEN cells > primary yolk sac cells > yolk sac cell line; no vacuolization was observed in rat fibroblast cells (line Li1) and mouse ESCs (line HM1). E4.5 blastocysts, E12.5 dissociated yolk sacs and ExEn lineage cells, except XEN cells, were cultured in condition A with additional 14% FBS for 7 days (blastocyst), 4 days (yolk sac), or 2 days (cell lines), respectively. XEN cells, Li1, and HM1 cells were cultured for 2 days in their respective routine culture media but with additional 20% FBS. Arrow head indicates vacuole. **(D)** Vacuole-inducing capacity of serum and Albumax1 filtrate. 2% or 16% of unfiltered FBS or Albumax1, of >50 KDa retentate, and of the <50KDa filtrate were compared. Upper row: 5,000 cells were cultured for 2 days at standard cell density (for vacuole formation). Lower row: 100 cells were seeded in plating assays and analyzed after 5 days. The numbers represent each condition. **(E)** Preventive or inhibitory effects of signaling drugs on vacuolization. The drugs were present for 1 day in addition to vacuole-inducing factors (0.5  $\mu$ M Chir or 16% FBS). Drug concentrations: 6  $\mu$ M Xav939; 40  $\mu$ M PMA; 20  $\mu$ M Forskolin; 20  $\mu$ M Y-27632; 65  $\mu$ M Cytochalasin D (Cyto D); 50  $\mu$ M PD0325901; 1  $\mu$ M ZSTK474; 50 nM Imatinib. **(F)** Assessment of the intravacuolar milieu. For the pH assessments, cells were cultured with and without additional 14% FBS (final concentrations: 2 vs. 16% FBS) and then stained with Neutral Red, Probe 1, or FITC-Dextran/Lysotracker. The pH color scale for Probe 1 is taken from Lee MH et al., 2013. For the Ca assessment, cells were cultured without or with 0.5  $\mu$ M of Chir, and then stained with Fluo-3am. **(G)** Assessment of vacuolar pH in vacuoles that were induced with three different drugs: 0.5  $\mu$ M Chir, 1  $\mu$ M Bim1, or 2  $\mu$ M Gö6983. pH was assessed by incubation with FITC-Dextran or Neutral Red on Day 2. Scale bars, 50  $\mu$ m (A-G). All photos represent at least two independent experiments. Except for (D), the experiments were based on condition A. FITC-Dex, FITC-Dextran. Alb1, Albumax1.

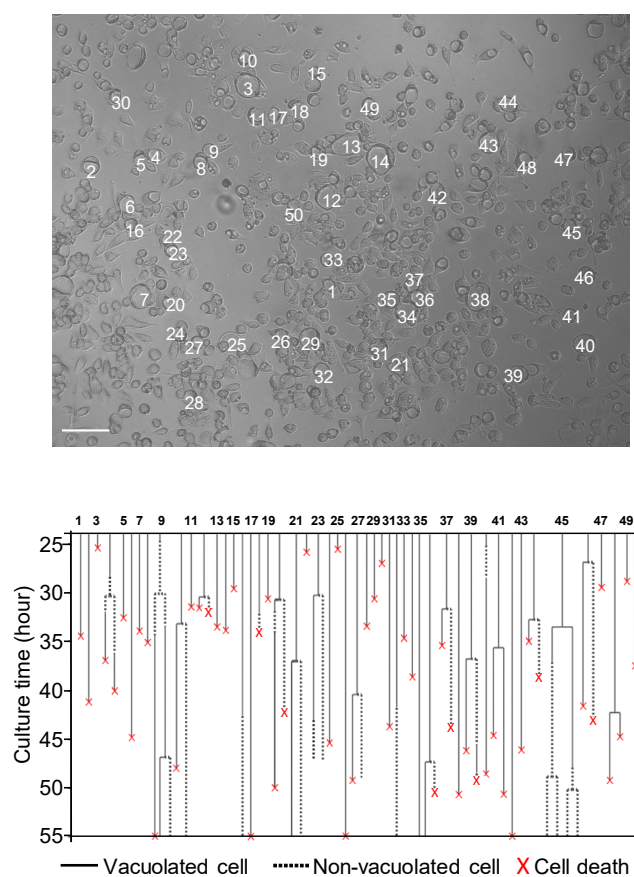

**Fig. S2. Fate of vacuolated cells.** 50 cells were tracked in condition A with additional 14% FBS on live cell imager from 48 to 80 hours (Video SV5). Scale bar, 100  $\mu$ m.



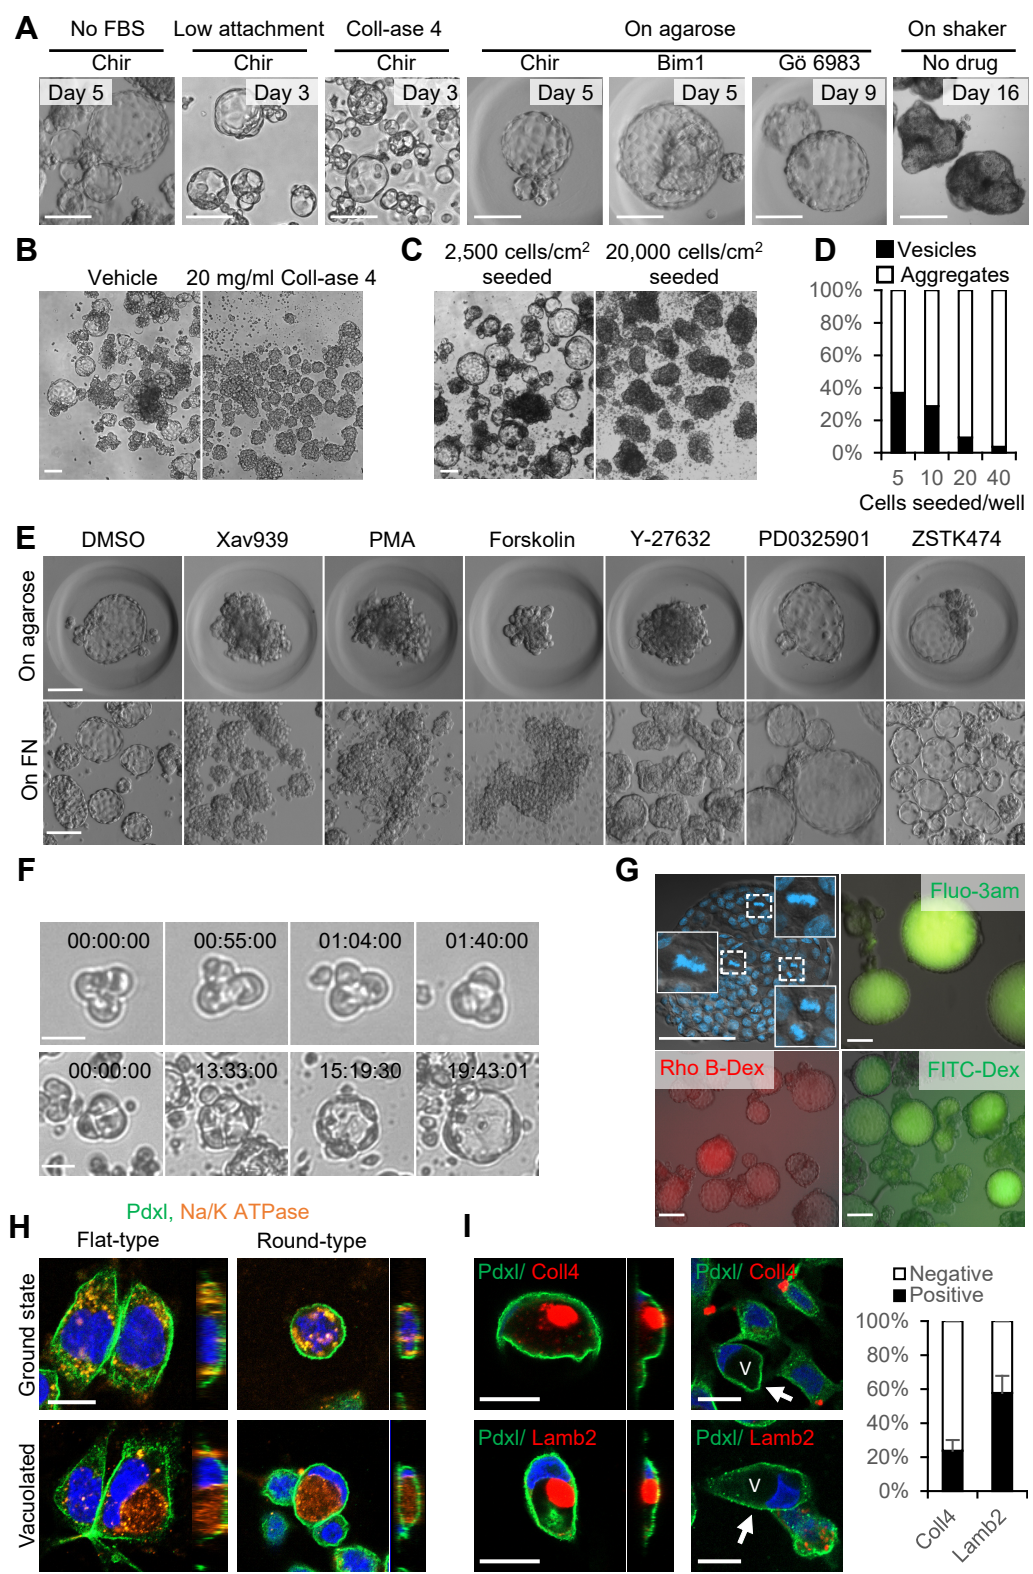



**Fig. S3. Additional characterization of vesicle-producing cultures.** **(A)** Comparison of vesicle-inducing conditions. pXEN cells were cultured for the indicated times under condition A, but with the indicated modifications (including no FBS instead of 2% FBS; low attachment plastic plates or agarose microwells instead of fibronectin-coated plastic plates; on shaker instead of non-moving plates) and in the additional presence of the indicated drug (3  $\mu$ M Chir, 3  $\mu$ M Bim1, 5  $\mu$ M Gö 6983) or of collagenase 4 (0.1 mg/ml). Scale bars, 100  $\mu$ m (except on shaker), 300  $\mu$ m (on shaker). **(B)** Treatment with a high collagenase 4 concentration prevents vesiculation and instead causes aggregation. Cells were cultured in 4-well plates under condition B. Scale bar, 100  $\mu$ m. The photos are representative of 3 independent experiments. **(C)** High cell density prevents vesiculation and instead causes aggregation. Cells were cultured in 4-well plates under condition B. Scale bar, 100  $\mu$ m. The photos are representative of 3 independent experiments. **(D)** High cell density prevents vesiculation and instead causes aggregation. Cells were cultured in agarose microwells under condition A + 3  $\mu$ M Chir. Numbers are based on 2 independent experiments. **(E)** Inhibitory effects of some signaling drugs on vesicle formation. Vesicles were formed over 5 days in condition A plus 3  $\mu$ M Chir or condition B (which already includes 3  $\mu$ M Chir). Cells were cultured in 3% agarose microwells for condition A and on fibronectin-coated wells for condition B. 3  $\mu$ M Xav939; 20  $\mu$ M PMA; 20  $\mu$ M Forskolin; 40  $\mu$ M Y-27632; 50  $\mu$ M PD0325901; 1  $\mu$ M ZSTK474. Scale bars, 100  $\mu$ m. **(F)** Movie images showing one example of transition from vacuolar to vesicular lumen (see Videos SV9 and 10). 3 vacuolated cells formed one lumen (top) and kept growing (bottom). hr:min:sec. Scale bar, 25  $\mu$ m (top), 50  $\mu$ m (bottom). **(G)** Expansion of vesicles. Shown are vesicles stained with DAPI (boxes: mitotic chromosomes) or photographed after incubation with Fluo-3am, Rho B-Dextran, or FITC-Dextran. Scale bars, 100  $\mu$ m. **(H)** Top and side views of “ground state” and vacuolated pXEN cells stained for Pdxl and Na/K ATPase. Note that in rounded but not flat cells, Pdxl is also present in the bottom part of the plasma membrane. The photos represent three independent experiments. Blue, nuclei (DAPI stain). **(I)** Photos: Top and side views of vacuolated pXEN cells immunostained for Pdxl, collagen 4, and laminin B2. The photos show examples of vacuoles that are filled with laminin or collagen (left) or free of these proteins (right). Columns: Percentages of collagen 4-positive or laminin B2-positive vacuoles at the vacuolated stage. V and arrows indicate vacuoles. Scale bars, 20  $\mu$ m (H, I). Mean $\pm$ s.e.m. from 5 independent experiments.

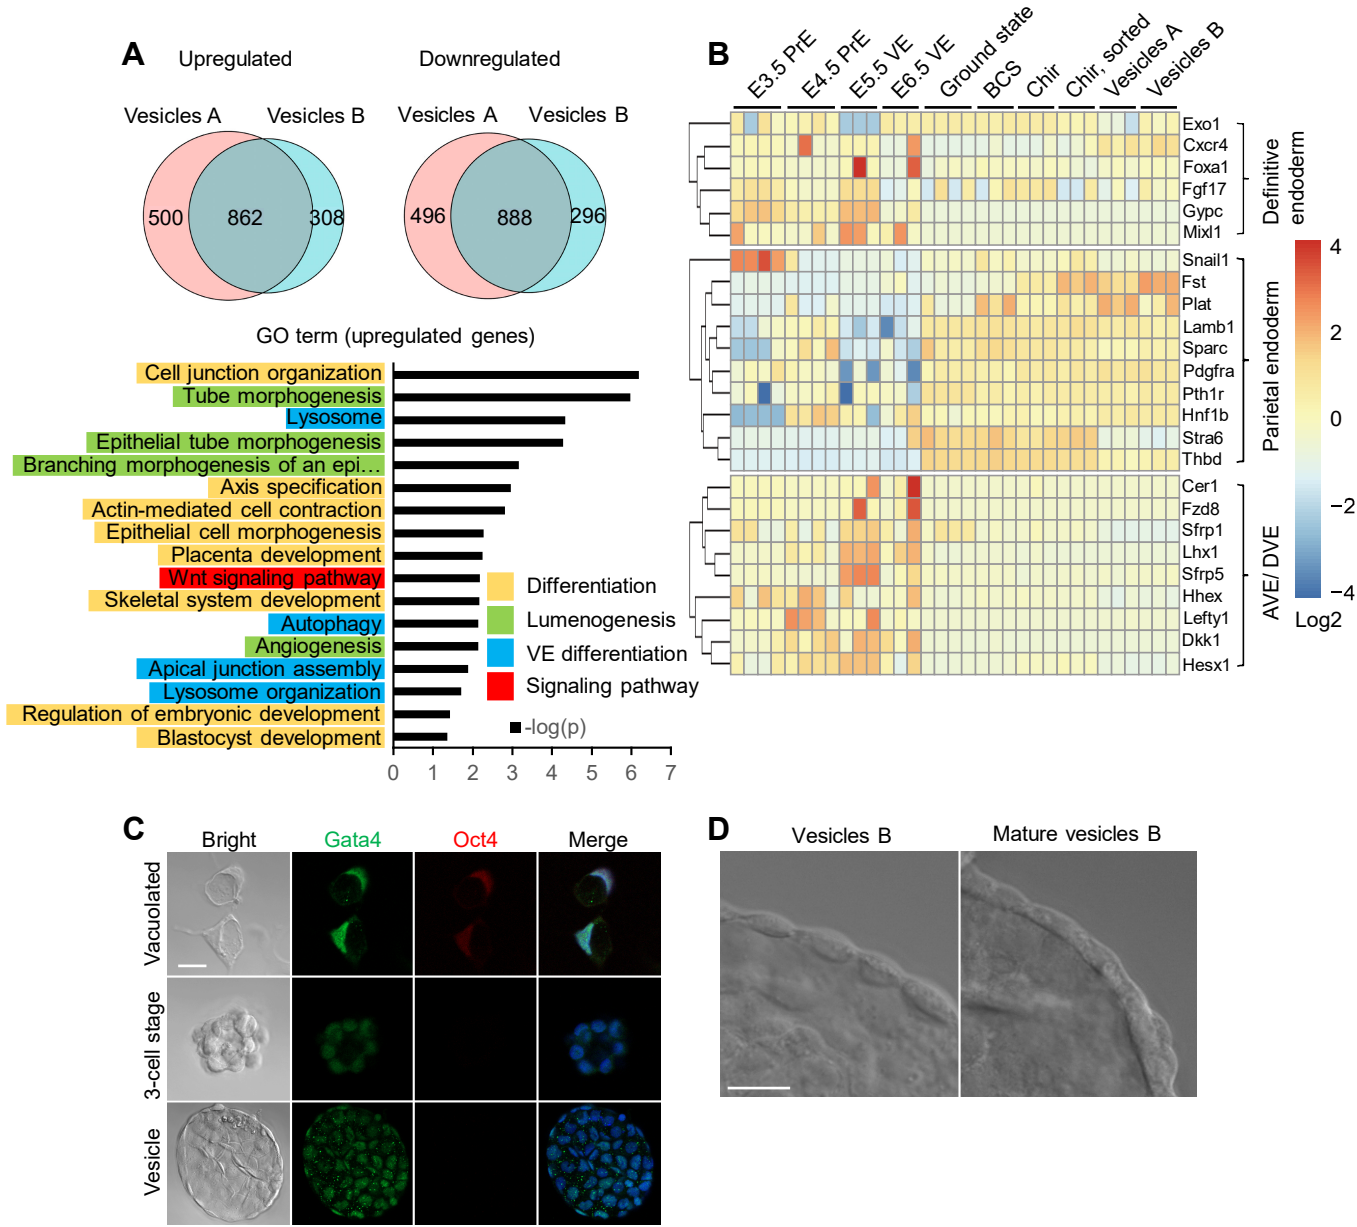

**Fig. S4. Transcriptome analysis of vesiculation.** **(A)** Comparison of normal pXEN cells with “Vesicles A” (condition A plus 3  $\mu$ M Chir) and “Vesicles B” (condition B, which already includes 3  $\mu$ M Chir). Top, Venn diagrams. Bottom, Gene ontology of biological annotation; same colors indicate related meanings (see color legend). See also Tables S10 and S11. **(B)** Heatmap comparison of definitive endoderm, parietal endoderm, anterior visceral endoderm (AVE)/ distal visceral endoderm (DVE) marker gene expression in “ground state” (condition A= maintenance condition) pXEN cells, vacuolated pXEN cells, pXEN cell-derived vesicles, and related in vivo samples. **(C)** Immunostainings showing disappearance of the pluripotency marker Oct4, but maintenance of the PrE marker Gata4, during vacuolization and vesicular morphogenesis of pXEN cells. **(D)** Epithelial morphologies of immature (Vesicles B; with Chir) and more mature (Mature vesicles B; Chir withdrawn) vesicles. Images in (C) and (D) were obtained with a confocal microscope. Scale bars, 20  $\mu$ m. All photos represent at least two independent experiments.



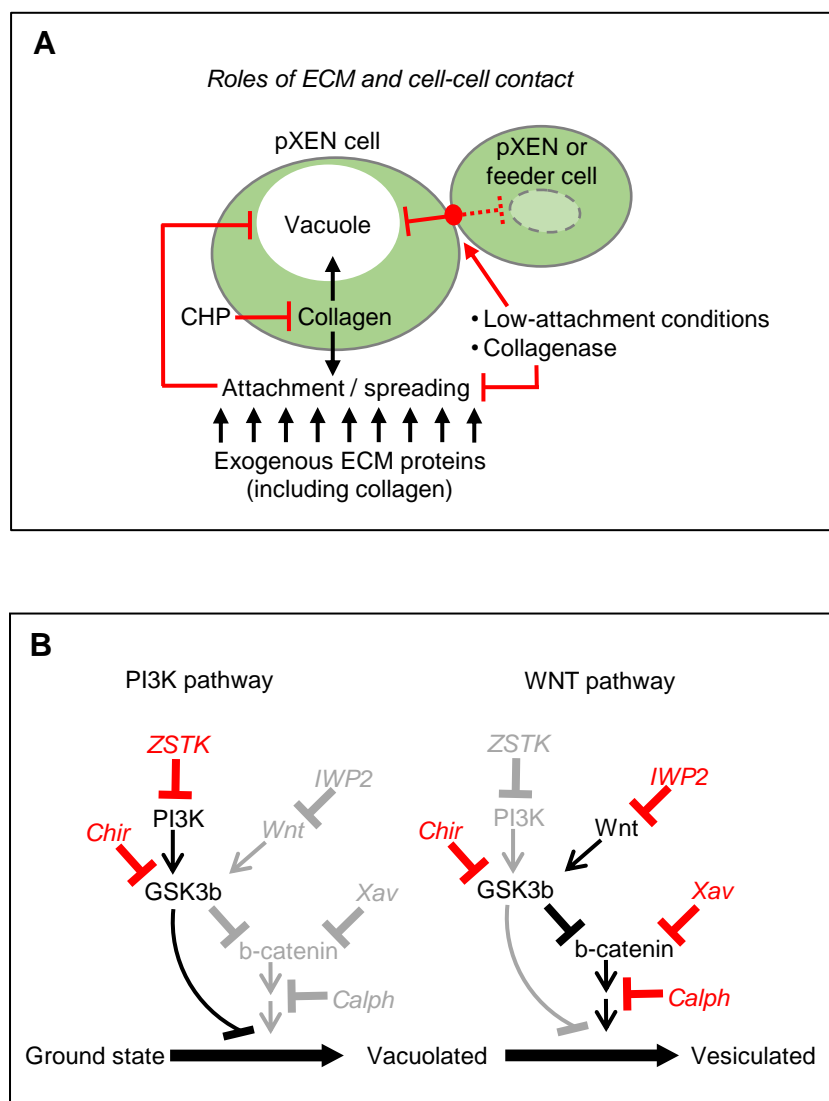

**Fig. S5. Control mechanisms of vesicular morphogenesis.** **(A)** Schematic summarizing control of vacuolization. pXEN cells have an inherent tendency to create vacuoles, which is held in check by ECM proteins (notably including self-synthesized collagen) and by cell-cell contact. Note that endogenously synthesized collagen can be secreted both out of the cell and into vacuoles, although not necessarily at the same time. **(B)** Potential roles of PI3K and Wnt pathways. Only the results obtained with drugs that are directly relevant to those pathways are included. Each drug was tested both in the vacuolization and in the vesiculation stage. Drugs that showed effects are depicted in red color. When a drug showed no effect, it is depicted in grey color. Full drug names, see Materials and Methods.

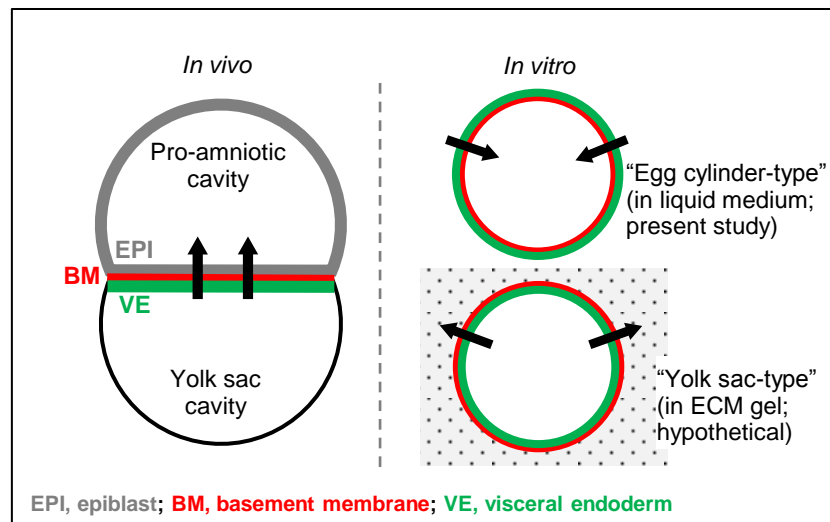

**Fig. S6. Schematic explaining relationship of VE-like vesicles with egg cylinder.** It depends on the function studied whether a vesicle is “in vivo-like”. **Left**, Schematic of the egg cylinder-stage embryo with distorted proportions to emphasize topology (for a schematic of the egg cylinder with realistic proportions, see Fig. 6B). Also shown is the transport function of the early VE (arrow), which is executed in tandem with the epiblast. The schematic ignores that later the pro-amniotic cavity also extends into the extraembryonic ectoderm, but this does not alter the notions discussed. **Right**, Depending on their orientation, VE vesicles represent different functions of the VE in vitro. For transport studies, “egg cylinder-type” VE vesicles (present study) are more in vivo-like, as the yolk sac cavity is the “outside”. Such vesicles are also more practical, as they do not need pre-loading. “Yolk sac-type” VE vesicles were not produced in the present study but probably are feasible when using an ECM gel.

| <b>Table S1. Chemicals, culture additives, growth factors</b> |                                             |                      |
|---------------------------------------------------------------|---------------------------------------------|----------------------|
| <b>Product</b>                                                | <b>Company</b>                              | <b>Catalog No.</b>   |
| 0.05% trypsin/ EDTA                                           | Welgene, Gyeongsan, Korea                   | LS015-09             |
| A83-01                                                        | Peprotech, RI, U.S.                         | 9094360              |
| Advanced DMEM/F12                                             | ThermoFisher, Waltham, MA, U.S.             | 12634-010            |
| Albumax1                                                      | ThermoFisher                                | 11020-021            |
| Ascorbic acid                                                 | Sigma, St. Louis, MO. U.S.                  | A8960                |
| B27 supplement without vitamin A                              | ThermoFisher                                | 12587-010            |
| $\beta$ -mercaptoethanol                                      | Sigma                                       | M7522                |
| BCS                                                           | Welgene                                     | S003-05              |
| Bovine fibronectin                                            | ThermoFisher                                | 33010018             |
| Crytal violet                                                 | Sigma                                       | C.I. 42555           |
| DMEM (high glucose)                                           | Sigma                                       | D6429                |
| DMEM (low glucose)                                            | Sigma                                       | D6046                |
| DMEM/F12                                                      | ThermoFisher                                | 21331-020            |
| Donkey serum                                                  | Genetex, Irvine, CA U.S.                    | GTX73205             |
| EGF                                                           | Miltenyi Biotec, Bergisch Gladbach, Germany | 130-093-825          |
| Fatty acid-free BSA                                           | GenDEPOT, Katy, TX, U.S.                    | A0100-010            |
| FBS                                                           | MP biomedical, Santa Ana, CA, U.S.          | 2916754 (Lot# M6164) |
| Fraction V BSA                                                | Roche, Basel, Switzerland                   | 10774111103          |
| Glutamax                                                      | ThermoFisher                                | 35050061             |
| Hybrid-R (RNA extraction)                                     | GeneAll, Seoul, Korea                       | 305-101              |
| ITS                                                           | ThermoFisher                                | 41400                |
| Knockout serum replacement                                    | ThermoFisher                                | 10828-010            |
| LA-BSA                                                        | Sigma                                       | L9530                |
| LIF                                                           | ORF Genetics, Kopavogur, Iceland            | 01-A1140             |
| MCDB-201                                                      | Sigma                                       | M6770                |
| Mitomycin C                                                   | Tocris, Bristol, UK                         | 3258                 |
| N2 supplement                                                 | ThermoFisher                                | 17502-048            |
| N-acetylcysteine                                              | Sigma                                       | A7250                |
| Neurobasal                                                    | ThermoFisher                                | 21103-049            |
| Paraformaldehyde                                              | JUNSEI, Tokyo, Japan                        | 58295-1201           |
| PDGF                                                          | ThermoFisher                                | 14-8501-80           |
| Penicillin/ streptomycin                                      | ThermoFisher                                | 10378016             |
| Polyethylenimine (PEI) system                                 | Polyscience, Warrington, PA, U.S.           | 23966                |
| Propidium iodide                                              | Sigma                                       | P4170                |
| Puromycin                                                     | Invivogen, Pak Shek Kok, Hong Kong          | ant-pr-1             |
| Random hexamer                                                | Enzynomics, Daejeon, Korea                  | N101M                |
| Reverse transcriptase kit                                     | Solgent, Daejeon, Korea                     | DR23-R10k            |
| RNAse A                                                       | m.biotech, Hanam, Korea                     | 43014                |
| SYBR green                                                    | Enzynomics                                  | RT500M               |



|              |                                           |           |
|--------------|-------------------------------------------|-----------|
| Triton X-100 | Fisher Scientific, Hampton, NH, U.S.      | T/3751/08 |
| Trizol       | TAKARA, Kusatsu, Japan                    | 9109      |
| Vectashield  | Vector Laboratories, Burlingame, CA, U.S. | H-1000    |

**Table S2.** Molecules tested for effects on vacuolization and vesiculation

| Drug                                  | Catalog No.      | Company                                         |
|---------------------------------------|------------------|-------------------------------------------------|
| Bisindolylmaleimide 1 (Bim1)          | B-6191           | LC laboratories, Woburn, MA, U.S.               |
| Calphostin C                          | AG-CN2-0430-C100 | Adipogen, San Diego, CA, U.S.                   |
| Chir99021                             | 4423             | Tocris                                          |
| Cytochalasin D                        | 1233             | Tocris                                          |
| Forskolin                             | 1099             | Tocris                                          |
| Gö6983                                | G-7700           | LC laboratories                                 |
| Imatinib                              | I-5508           | LC laboratories                                 |
| IWP2                                  | 6866167          | Peprotech                                       |
| PD0325901                             | 4192             | Tocris                                          |
| PMA (Phorbol 12-myristate 13-acetate) | P-1680           | LC laboratories                                 |
| XAV939                                | 13596            | Cayman, Ann Arbor, MI, U.S.                     |
| Y-27632                               | A3008            | Apexbio, Boston, MA, U.S.                       |
| ZSTK474                               | S1072            | Selleck, Houston, TX, U.S.                      |
| cis-L-hydroxy-proline (CHP)           | H1169            | Tokyo chemical, Nihonbashi-honcho, Tokyo, Japan |
| Collagenase 4 (Coll-ase 4)            | LS004186         | Worthington, Lakewood, NJ, U.S.                 |

**Table S3.** Composition of media

| Culture condition | Media components                                                                                                                                                                                                                                                | Application                                                                     |
|-------------------|-----------------------------------------------------------------------------------------------------------------------------------------------------------------------------------------------------------------------------------------------------------------|---------------------------------------------------------------------------------|
| A                 | Low glucose DMEM, MCDB, 1% (v/v) penicillin/streptomycin, 1x (v/v) LA-BSA, 1x (v/v) ITS, 0.1 nM L-ascorbic acid, 2% (v/v) FBS, 0.5 $\mu$ M Dexamethasone, 10 ng/ml PDGF, 10 ng/ml EGF, 10 ng/ml LIF, 55 $\mu$ M $\beta$ -mercaptoethanol, 100 ng/ml fibronectin | Routine culture condition for rat and mouse pXEN and yolk sac stem cell culture |
| B                 | DMEM/F12, Neurobasal, 1x (v/v) N2, 1x (v/v) B27, 1% (v/v) penicillin/streptomycin, 1x (v/v) Glutamax, 10 ng/ml LIF, 100 $\mu$ M $\beta$ -mercaptoethanol, 3 $\mu$ M Chir99021                                                                                   | Vesicle and duct formation                                                      |
| C                 | Advanced DMEM/F12, 1x (v/v) N2, 1x (v/v) B27, 1% (v/v) penicillin/streptomycin, 1x (v/v) Glutamax, 1.25 mM N-acetylcysteine, 50 ng/ml EGF, 500 nM A83-01                                                                                                        | Differentiation of vesicles                                                     |
| XEN cells         | 70% (v/v) conditioned medium (three days on Mitomycin C treated MEF) with 30% (v/v) fresh medium (RPMI 1640 (Sigma, R0883), 20% (v/v) FBS, 1% (v/v) penicillin/streptomycin, 1 mM sodium pyruvate (Sigma, P5280), 2 mM L-glutamine (Sigma, G8540))              | Observation of vacuoles                                                         |
| Li1 cells         | High glucose DMEM, 1% (v/v) penicillin/streptomycin, 7.5% (v/v) FBS                                                                                                                                                                                             | Feeder cells or control cells                                                   |
| HM1 cells         | High glucose DMEM, 1% (v/v) penicillin/streptomycin, 15% (v/v) FBS, 10 ng/ml LIF, 100 $\mu$ M $\beta$ -mercaptoethanol, 0.1% gelatin                                                                                                                            | Control cells                                                                   |

**Table S4.** Organisms/strains

| Species (organ)  | Sex    | Strain | Age      | Company                    |
|------------------|--------|--------|----------|----------------------------|
| Mouse (Yolk sac) | Female | ICR    | 12 weeks | Koatech, Pyeongtaek, Korea |
| Rat (Blastocyst) | Female | SD     | 11 weeks | Koatech                    |
| Rat (Yolk sac)   | Female | SD     | 10 weeks | Koatech                    |

**Table S5.** Cell lines

| Cell line | Species | Strain | Sex | Reference                                 |
|-----------|---------|--------|-----|-------------------------------------------|
| CX1 (RX1) | rat     | WKY    | M   | Debeb et al., 2009, Zhong et al., 2018    |
| HM1       | mouse   | 129    | M   | Magin et al., 1992                        |
| Li1       | rat     | SD     | F   | Debeb et al., 2009                        |
| MAX3      | rat     | F344   | M   | Zhong et al., 2018, Lo Nigro et al., 2012 |
| pXEN6     | mouse   | ICR    | F   | Zhong et al., 2018                        |
| XEN5      | mouse   | ICR    | M   | Zhong et al., 2018                        |

**Table S6.** Organelle markers

| Plasmid              | Target         | Company                            | Catalog No.                |
|----------------------|----------------|------------------------------------|----------------------------|
| B4GALT1-pmTurquoise2 | Golgi          | Addgene,<br>Watertown, MA,<br>U.S. | 36205, RRID: Addgene_36205 |
| COX8A-pmTurquoise2   | Mitochondria   |                                    | 36208, RRID: Addgene_36208 |
| Lamp1-RFP            | Lysosome       |                                    | 1817, RRID: Addgene_1817   |
| Sec61-mCh            | ER             |                                    | 49155, RRID: Addgene_49155 |
| Rab5-mRFP            | Early endosome |                                    | 14437, RRID: Addgene_14437 |
| Rab7-GFP             | Late endosome  |                                    | 12605, RRID: Addgene_12605 |

**Table S7.** Antibodies, phalloidin, DBA

|     | Target                                           | Company                      | Catalog No.                         | Dilution | Host   |
|-----|--------------------------------------------------|------------------------------|-------------------------------------|----------|--------|
| 1st | Afp (Alpha-fetoprotein)                          | Cusabio, Houston, TX, U.S.   | CSB-PA001421LA01MO, RRID: Not found | 1:200    | Rabbit |
| 1st | Cdh1 (E-cadherin)                                | Bioss, Woburn, MA, U.S.      | bs-10009R, RRID: Not found          | 1:200    | Rabbit |
| 1st | Cer1 (Cerberus 1)                                | Santa Cruz, Dallas, TX, U.S. | sc-515324, RRID: Not found          | 1:200    | Mouse  |
| 1st | Collagen4 (type 4 collagen)                      | Hybridoma bank               | M3F7, RRID: AB_528167               | 1:200    | Mouse  |
| 1st | DBA (Dolichos biflorus agglutinin)               | Vector lab                   | RL-1032, RRID: AB_2336396           | 1:100    | N/A    |
| 1st | Gata4 (GATA Binding Protein 4)                   | Santa Cruz                   | sc-9053, RRID: AB_2247396           | 1:100    | Rabbit |
| 1st | Lamb2 (Laminin, beta 2)                          | Hybridoma bank, IA, U.S.     | D18, RRID: AB_2281095               | 1:200    | Mouse  |
| 1st | Lrp2 (Low density lipoprotein-related protein 2) | Hybridoma bank               | 20B megalin, RRID: AB_2753214       | 1:200    | Mouse  |

|     |                                               |                                              |                                  |         |        |
|-----|-----------------------------------------------|----------------------------------------------|----------------------------------|---------|--------|
| 1st | Oct4 (octamer-binding transcription factor 4) | Santa Cruz                                   | sc-5279,<br>RRID: AB_628051      | 1:100   | Mouse  |
| 1st | Fluorescent Dye 594-I Phalloidin              | Abnova, Taipei, Taiwan                       | A10200,<br>RRID: Not found       | 1:10000 | N/A    |
| 1st | Pdcl (Podocalyxin)                            | Abclonal, Woburn, MA, U.S.                   | bs-1345R,<br>RRID: AB_2757722    | 1:200   | Rabbit |
| 1st | Na/K ATPase                                   | Hybridoma bank                               | A6F,<br>RRID: AB_528092          | 1:100   | Mouse  |
| 1st | Na/K ATPase                                   | Abclonal                                     | A7878,<br>RRID: AB_2768499       | 1:100   | Rabbit |
| 1st | Zo-1                                          | Biorbyt, Cambs, UK                           | orb340146<br>RRID: Not found     | 1:200   | Rabbit |
| 2nd | anti-mouse Alexa 488                          | Jackson ImmunoResearch, West Grove, PA, U.S. | 715-545-150,<br>RRID: AB_2340846 | 1:200   | Donkey |
| 2nd | anti-rabbit DyLight 488                       | Bethyl, Montgomery, TX, U.S.                 | A120-108D2,<br>RRID: AB_10634082 | 1:200   | Donkey |
| 2nd | anti-mouse DyLight 594                        | Bethyl                                       | A90-337D4,<br>RRID: AB_10630877  | 1:200   | Donkey |

**Table S8.** Primers used for quantitative RT-PCR

| Primer name | Forward primer (5'→3')    | Reverse primer (5'→3')   | Product size (bp) | Species       |
|-------------|---------------------------|--------------------------|-------------------|---------------|
| beta-actin  | CCTGGGTATGGAATCCTGTG      | AGCAATGATCTTGATCTTCATGG  | 196               | Rat and Mouse |
| Oct4        | GAGGGATGGCATACTGTGGAC     | GGTGTACCCAAGGTGATCC      | 272               |               |
| Gata4       | GTGCCAACTGCCAGACTACC      | CCTCCTCCGCATTGCAAGA      | 282               |               |
| Gata6       | CATCATCACCACCCGACCTA      | GCTGAGGCCGTTTCATCTTACT   | 282               |               |
| Sox17       | GAACCCGGATCTGCACAACG      | CTTCTCCGCCAAGGTCAACG     | 76                |               |
| Sox7        | GAGAGGAAACGTCTGGCAGT      | CTGCCTCATCCACATAGGGC     | 121               |               |
| Occludin    | GGCCTTTTGAGAGTCCACCT      | AAAGAGTATGCCGGCTGAGA     | 127               |               |
| Cdh1        | AAGGGCTTGGATTTTGAGG       | AAATGGGGGCTTCATTAC       | 139               |               |
| Ihh         | CCTGTCAGCTGTAAAGCCAGG     | GGAGCATAGGACCCAAGGG      | 336               |               |
| Epcam       | GAGTCCTTGTTCATTCAT        | TCTCCTTTATCTCAGCCTTC     | 250               |               |
| Cited1      | CCACTAGCCCCTCTGGATCA      | AGCCCCTTGGTACTGGCTAT     | 146               |               |
| Lrp2        | GCAGAGATGGACAGTGAGGT      | GCTGGCGAGGCTATACG        | 175               |               |
| Cer1        | TTGCTTTGGGAAATGCGGTT      | GTGCGTGGTGGTGAATTTGG     | 100               |               |
| Lefty1      | CTTGATCGACCGCCAGTCTTG     | CTGCCACCTCTCGAAAGTTCT    | 151               |               |
| Otx2        | TCTTCATGCGGGAGGAGGTA      | TCTGACCTCCGTTCTGTTGC     | 123               |               |
| Afp         | GCCCAGCATATGAAGAAAACA     | TCTCTTTGTCTGGAAGCATTCT   | 176               |               |
| Ttr         | TGGACACCAATCGTACTGG       | GATGGTGTAGTGGCGATGA      | 104               |               |
| Apoa4       | CCCAGCTAAGCAACAATGCC      | CATCATGTTGGCCCGTAGGT     | 236               |               |
| Krt19       | CTAATGGCGAGCTGGAGGTGAAG   | GGCGGGCATTGTCGATCTGTAGGA | 168               | Rat only      |
| Hnf4a       | GAGTTTGAAATGTGCAGGTGTTGAC | GCTGTTGGATGAGTTGAGGTTG   | 81                |               |
| Zo1         | GCGGGCTACCTTATTGAATG      | GTCATGGGAGCGAACTGAAT     | 124               |               |
| Apoa1       | AGGGTGAAGGATTTCGCCAC      | CTGTTCTGTAGGCGACCAA      | 162               |               |
| ApoB        | TGGAGAACTGACTGCACACG      | CCCTCCAAGTCCCAAAGTCC     | 276               |               |



**Table S9.** Published gene expression profiling data downloaded from GEO database

| Accession No. | Source                                                                                                | Cell type               | Platform | Species |
|---------------|-------------------------------------------------------------------------------------------------------|-------------------------|----------|---------|
| SRX2963215    | <a href="https://www.ncbi.nlm.nih.gov/sra/SRX2963215">https://www.ncbi.nlm.nih.gov/sra/SRX2963215</a> | E3.5 Epiblast           | RNA-seq  | Mouse   |
| SRX2963247    | <a href="https://www.ncbi.nlm.nih.gov/sra/SRX2963247">https://www.ncbi.nlm.nih.gov/sra/SRX2963247</a> |                         | RNA-seq  | Mouse   |
| SRX2963257    | <a href="https://www.ncbi.nlm.nih.gov/sra/SRX2963257">https://www.ncbi.nlm.nih.gov/sra/SRX2963257</a> |                         | RNA-seq  | Mouse   |
| SRX2963266    | <a href="https://www.ncbi.nlm.nih.gov/sra/SRX2963266">https://www.ncbi.nlm.nih.gov/sra/SRX2963266</a> |                         | RNA-seq  | Mouse   |
| SRX2963325    | <a href="https://www.ncbi.nlm.nih.gov/sra/SRX2963325">https://www.ncbi.nlm.nih.gov/sra/SRX2963325</a> | E4.5 Epiblast           | RNA-seq  | Mouse   |
| SRX2963353    | <a href="https://www.ncbi.nlm.nih.gov/sra/SRX2963353">https://www.ncbi.nlm.nih.gov/sra/SRX2963353</a> |                         | RNA-seq  | Mouse   |
| SRX2963356    | <a href="https://www.ncbi.nlm.nih.gov/sra/SRX2963356">https://www.ncbi.nlm.nih.gov/sra/SRX2963356</a> |                         | RNA-seq  | Mouse   |
| SRX2963362    | <a href="https://www.ncbi.nlm.nih.gov/sra/SRX2963362">https://www.ncbi.nlm.nih.gov/sra/SRX2963362</a> |                         | RNA-seq  | Mouse   |
| SRX2963469    | <a href="https://www.ncbi.nlm.nih.gov/sra/SRX2963469">https://www.ncbi.nlm.nih.gov/sra/SRX2963469</a> | E5.5 Epiblast           | RNA-seq  | Mouse   |
| SRX2963478    | <a href="https://www.ncbi.nlm.nih.gov/sra/SRX2963478">https://www.ncbi.nlm.nih.gov/sra/SRX2963478</a> |                         | RNA-seq  | Mouse   |
| SRX2963490    | <a href="https://www.ncbi.nlm.nih.gov/sra/SRX2963490">https://www.ncbi.nlm.nih.gov/sra/SRX2963490</a> |                         | RNA-seq  | Mouse   |
| SRX2963498    | <a href="https://www.ncbi.nlm.nih.gov/sra/SRX2963498">https://www.ncbi.nlm.nih.gov/sra/SRX2963498</a> |                         | RNA-seq  | Mouse   |
| SRX2963686    | <a href="https://www.ncbi.nlm.nih.gov/sra/SRX2963686">https://www.ncbi.nlm.nih.gov/sra/SRX2963686</a> | E6.5 Epiblast           | RNA-seq  | Mouse   |
| SRX2963796    | <a href="https://www.ncbi.nlm.nih.gov/sra/SRX2963796">https://www.ncbi.nlm.nih.gov/sra/SRX2963796</a> |                         | RNA-seq  | Mouse   |
| SRX2963808    | <a href="https://www.ncbi.nlm.nih.gov/sra/SRX2963808">https://www.ncbi.nlm.nih.gov/sra/SRX2963808</a> |                         | RNA-seq  | Mouse   |
| SRX2963827    | <a href="https://www.ncbi.nlm.nih.gov/sra/SRX2963827">https://www.ncbi.nlm.nih.gov/sra/SRX2963827</a> |                         | RNA-seq  | Mouse   |
| SRX2963225    | <a href="https://www.ncbi.nlm.nih.gov/sra/SRX2963225">https://www.ncbi.nlm.nih.gov/sra/SRX2963225</a> | E3.5 Primitive endoderm | RNA-seq  | Mouse   |
| SRX2963238    | <a href="https://www.ncbi.nlm.nih.gov/sra/SRX2963238">https://www.ncbi.nlm.nih.gov/sra/SRX2963238</a> |                         | RNA-seq  | Mouse   |
| SRX2963241    | <a href="https://www.ncbi.nlm.nih.gov/sra/SRX2963241">https://www.ncbi.nlm.nih.gov/sra/SRX2963241</a> |                         | RNA-seq  | Mouse   |
| SRX2963267    | <a href="https://www.ncbi.nlm.nih.gov/sra/SRX2963267">https://www.ncbi.nlm.nih.gov/sra/SRX2963267</a> |                         | RNA-seq  | Mouse   |
| SRX2963315    | <a href="https://www.ncbi.nlm.nih.gov/sra/SRX2963315">https://www.ncbi.nlm.nih.gov/sra/SRX2963315</a> | E4.5 Primitive endoderm | RNA-seq  | Mouse   |
| SRX2963319    | <a href="https://www.ncbi.nlm.nih.gov/sra/SRX2963319">https://www.ncbi.nlm.nih.gov/sra/SRX2963319</a> |                         | RNA-seq  | Mouse   |
| SRX2963326    | <a href="https://www.ncbi.nlm.nih.gov/sra/SRX2963326">https://www.ncbi.nlm.nih.gov/sra/SRX2963326</a> |                         | RNA-seq  | Mouse   |
| SRX2963346    | <a href="https://www.ncbi.nlm.nih.gov/sra/SRX2963346">https://www.ncbi.nlm.nih.gov/sra/SRX2963346</a> |                         | RNA-seq  | Mouse   |
| SRX2963467    | <a href="https://www.ncbi.nlm.nih.gov/sra/SRX2963467">https://www.ncbi.nlm.nih.gov/sra/SRX2963467</a> | E5.5 Visceral endoderm  | RNA-seq  | Mouse   |
| SRX2963481    | <a href="https://www.ncbi.nlm.nih.gov/sra/SRX2963481">https://www.ncbi.nlm.nih.gov/sra/SRX2963481</a> |                         | RNA-seq  | Mouse   |
| SRX2963506    | <a href="https://www.ncbi.nlm.nih.gov/sra/SRX2963506">https://www.ncbi.nlm.nih.gov/sra/SRX2963506</a> |                         | RNA-seq  | Mouse   |
| SRX2963699    | <a href="https://www.ncbi.nlm.nih.gov/sra/SRX2963699">https://www.ncbi.nlm.nih.gov/sra/SRX2963699</a> | E6.5 Visceral endoderm  | RNA-seq  | Mouse   |
| SRX2963705    | <a href="https://www.ncbi.nlm.nih.gov/sra/SRX2963705">https://www.ncbi.nlm.nih.gov/sra/SRX2963705</a> |                         | RNA-seq  | Mouse   |
| SRX2963787    | <a href="https://www.ncbi.nlm.nih.gov/sra/SRX2963787">https://www.ncbi.nlm.nih.gov/sra/SRX2963787</a> |                         | RNA-seq  | Mouse   |
| SRX1479560    | <a href="https://www.ncbi.nlm.nih.gov/sra/SRX1479560">https://www.ncbi.nlm.nih.gov/sra/SRX1479560</a> | E9.5 Visceral yolk sac  | RNA-seq  | Mouse   |
| SRX1479561    | <a href="https://www.ncbi.nlm.nih.gov/sra/SRX1479561">https://www.ncbi.nlm.nih.gov/sra/SRX1479561</a> |                         | RNA-seq  | Mouse   |
| SRX1479562    | <a href="https://www.ncbi.nlm.nih.gov/sra/SRX1479562">https://www.ncbi.nlm.nih.gov/sra/SRX1479562</a> |                         | RNA-seq  | Mouse   |
| SRX1479563    | <a href="https://www.ncbi.nlm.nih.gov/sra/SRX1479563">https://www.ncbi.nlm.nih.gov/sra/SRX1479563</a> |                         | RNA-seq  | Mouse   |
| SRX1479564    | <a href="https://www.ncbi.nlm.nih.gov/sra/SRX1479564">https://www.ncbi.nlm.nih.gov/sra/SRX1479564</a> |                         | RNA-seq  | Mouse   |
| SRX1479565    | <a href="https://www.ncbi.nlm.nih.gov/sra/SRX1479565">https://www.ncbi.nlm.nih.gov/sra/SRX1479565</a> |                         | RNA-seq  | Mouse   |

|            |                                                                                                       |                                 |         |       |
|------------|-------------------------------------------------------------------------------------------------------|---------------------------------|---------|-------|
| SRX1479566 | <a href="https://www.ncbi.nlm.nih.gov/sra/SRX1479566">https://www.ncbi.nlm.nih.gov/sra/SRX1479566</a> | E12.5<br>Visceral yolk<br>sac   | RNA-seq | Mouse |
| SRX1479567 | <a href="https://www.ncbi.nlm.nih.gov/sra/SRX1479567">https://www.ncbi.nlm.nih.gov/sra/SRX1479567</a> |                                 | RNA-seq | Mouse |
| SRX1479568 | <a href="https://www.ncbi.nlm.nih.gov/sra/SRX1479568">https://www.ncbi.nlm.nih.gov/sra/SRX1479568</a> | E16.5<br>Visceral yolk<br>sac   | RNA-seq | Mouse |
| SRX1479569 | <a href="https://www.ncbi.nlm.nih.gov/sra/SRX1479569">https://www.ncbi.nlm.nih.gov/sra/SRX1479569</a> |                                 | RNA-seq | Mouse |
| SRX1479570 | <a href="https://www.ncbi.nlm.nih.gov/sra/SRX1479570">https://www.ncbi.nlm.nih.gov/sra/SRX1479570</a> |                                 | RNA-seq | Mouse |
| SRX1479571 | <a href="https://www.ncbi.nlm.nih.gov/sra/SRX1479571">https://www.ncbi.nlm.nih.gov/sra/SRX1479571</a> |                                 | RNA-seq | Mouse |
| SRX3325623 | <a href="https://www.ncbi.nlm.nih.gov/sra/SRX3325623">https://www.ncbi.nlm.nih.gov/sra/SRX3325623</a> | pXEN cells<br>(ground<br>state) | RNA-seq | Rat   |
| SRX3325624 | <a href="https://www.ncbi.nlm.nih.gov/sra/SRX3325624">https://www.ncbi.nlm.nih.gov/sra/SRX3325624</a> |                                 | RNA-seq | Rat   |
| SRX3325625 | <a href="https://www.ncbi.nlm.nih.gov/sra/SRX3325625">https://www.ncbi.nlm.nih.gov/sra/SRX3325625</a> |                                 | RNA-seq | Rat   |
| SRX3325626 | <a href="https://www.ncbi.nlm.nih.gov/sra/SRX3325626">https://www.ncbi.nlm.nih.gov/sra/SRX3325626</a> |                                 | RNA-seq | Rat   |

Table S10 A. Overlapped upregulated genes of three versions of vacuolated rat pXEN cells (BCS-treated; Chir-treated; Chir-treated and AP-sorted) (related to Fig.2A, upper left)  
 B. Overlapped downregulated genes of three versions of vacuolated rat pXEN cells (BCS-treated; Chir-treated; Chir-treated and AP-sorted) (related to Fig.2A, upper right)  
 C. Overlapped upregulated genes of two versions of rat pXEN vesicles (serum-treated; serum free) (related to Fig.S4A, upper left)  
 D. Overlapped downregulated genes of two versions of rat pXEN vesicles (serum-treated; serum free) (related to Fig.S4A, upper right)

[Click here to Download Tables S10A-D](#)

Table S11 A. Functional annotation of vacuolization-associated rat pXEN cell genes, identified by comparison with the ground state ( $p < 0.002$ ) (related to Fig.2A, bottom)  
 B. Functional annotation of vesiculation-associated rat pXEN cell genes, identified by comparison with the ground state ( $p < 0.004$ ) (related to Fig.S4A, bottom)

[Click here to Download Tables S11A-B](#)

Table S12. Normalized gene expression profiling data.

[Click here to Download Table S12](#)

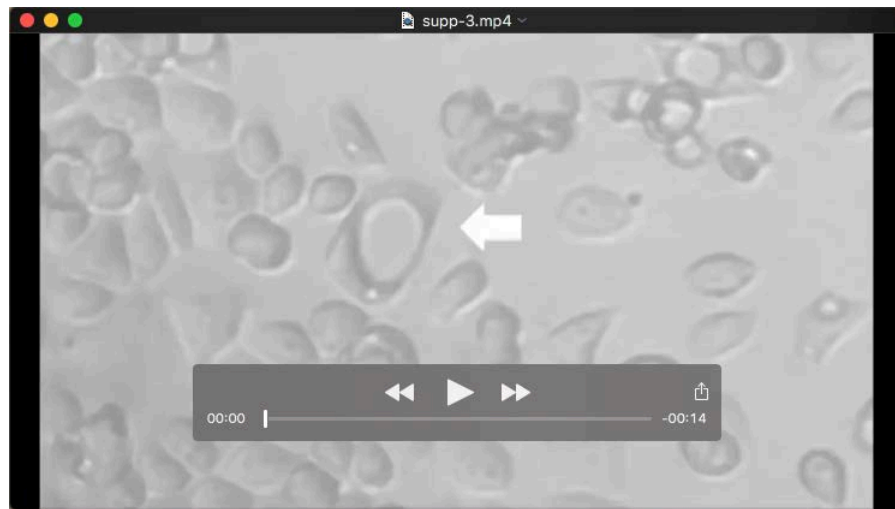

**Movie 1. Reversal of vacuolization by cell-cell contact.** It is shown how a single vacuolated cell (arrow) loses its vacuole when coming into contact with several non-vacuolated cells. The movie was taken 48 hours after adding 16% FBS.

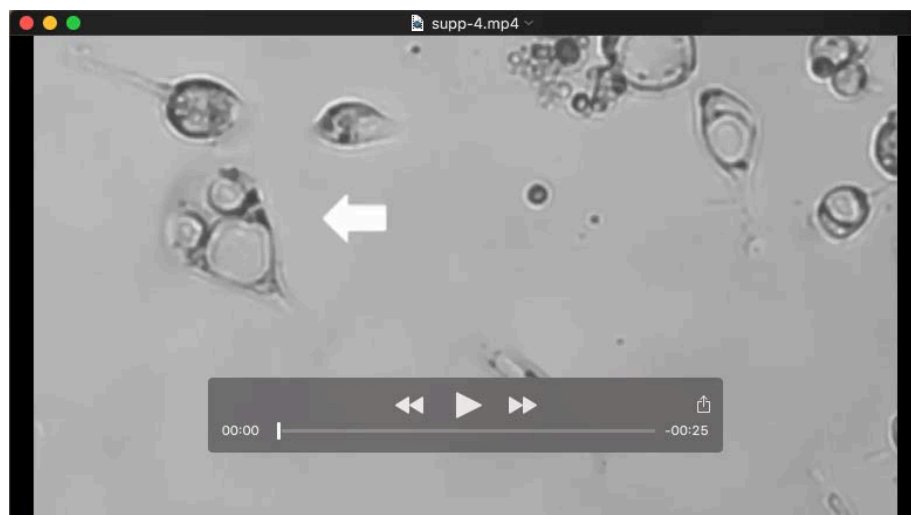

**Movie 2. Intracellular fusion of vacuoles.** Movie shows that in a single cell (arrow), 3 vacuoles merged into one. This movie relates to Fig. 1J.



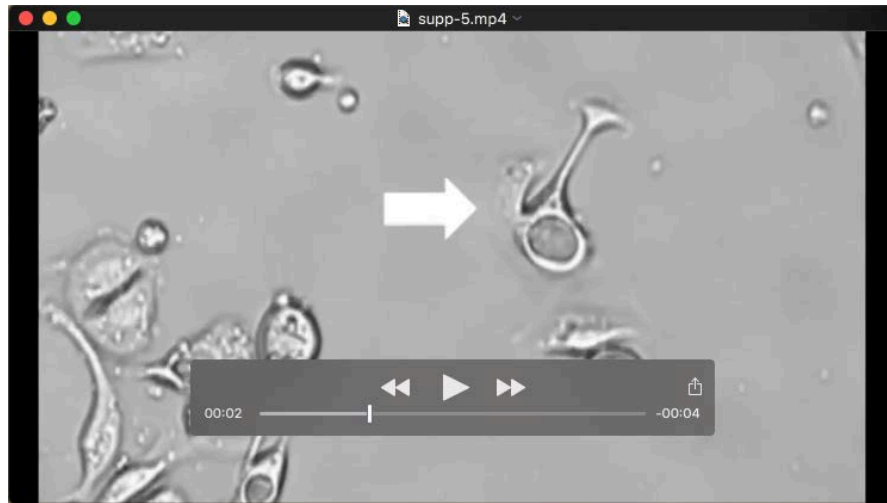

**Movie 3. Reversibility of vacuolization by transfer into low-serum condition.** Arrow indicates affected cell. This movie is related to Fig. 3B.

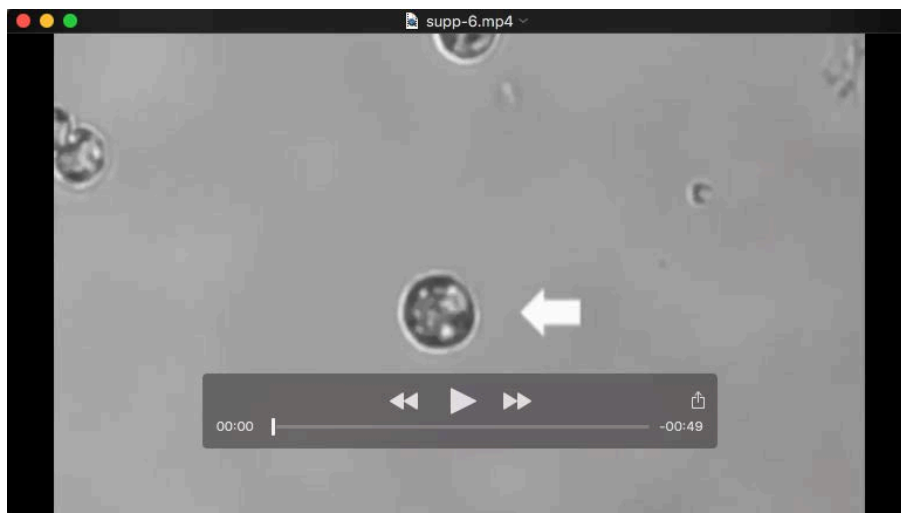

**Movie 4. Aberrant cytokinesis and death of a vacuolated cell.** Arrow indicates cell of interest. This movie is related to Fig. 3D.

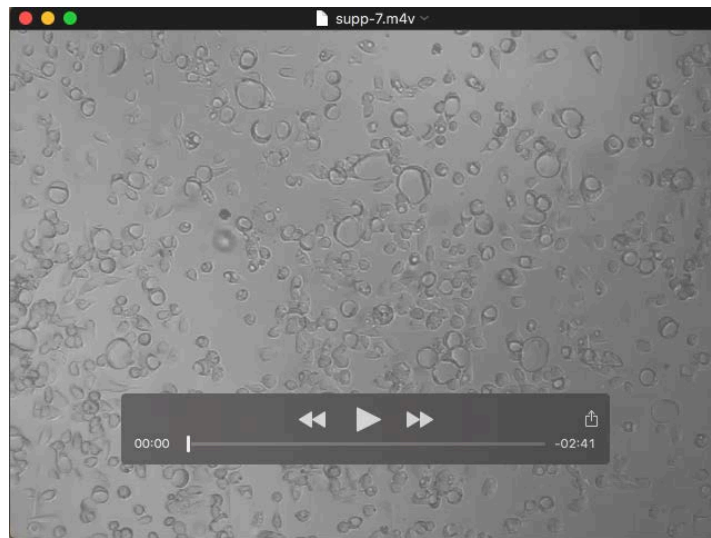

**Movie 5. Population analysis (50 cells) of vacuolated cell fates.** This movie is related to Fig. S2.

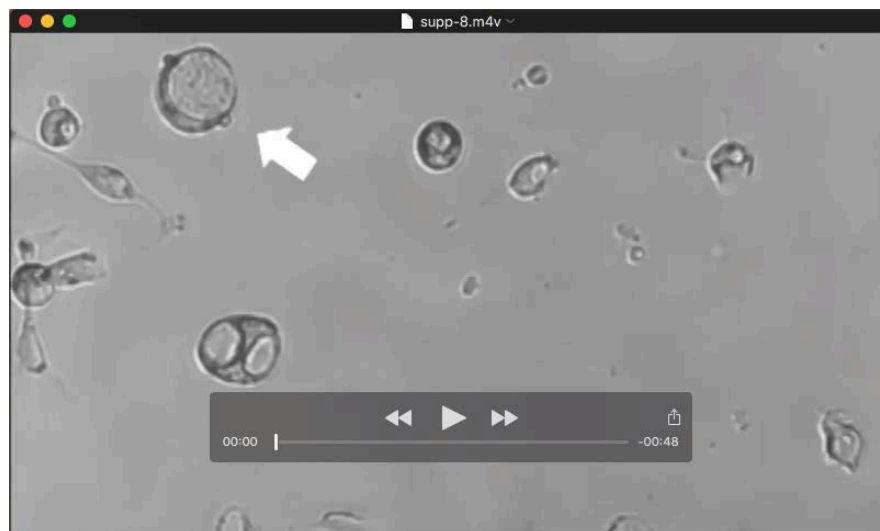

**Movie 6. Patterns of cell division in surviving vacuolated cells: Type 1.** This movie is related to Fig. 3E (top). Arrow indicates mother cell and arrow head indicates daughter cell.

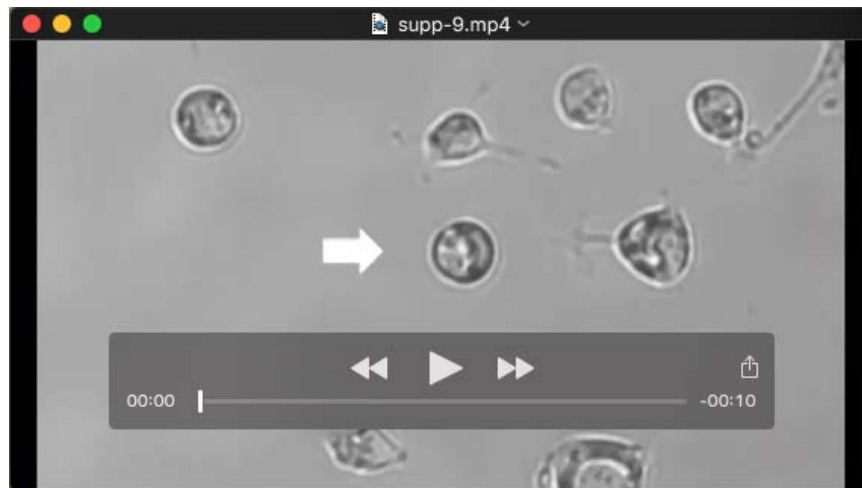

**Movie 7. Patterns of cell division in surviving vacuolated cells: Type 2.** This movie is related to Fig. 3E (middle). Arrow indicates cell of interest.

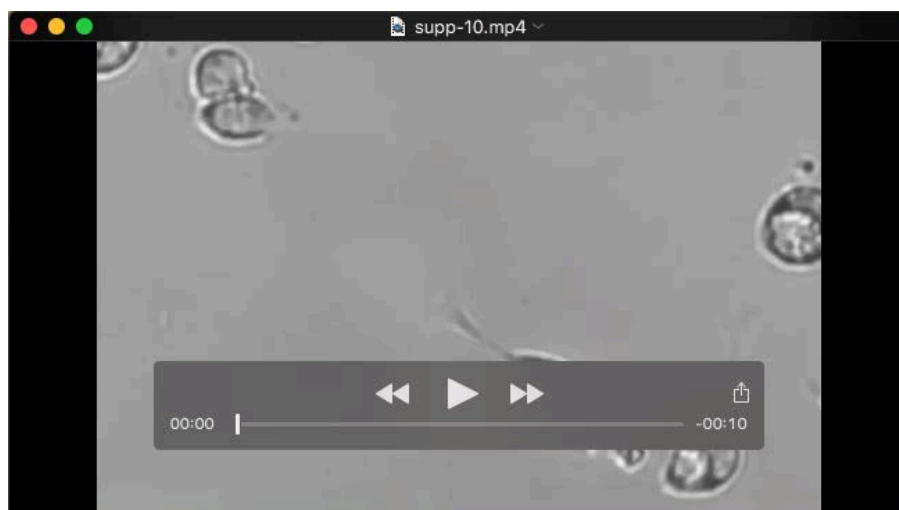

**Movie 8. Patterns of cell division in surviving vacuolated cells: Type 3.** This movie is related to Fig. 3E (bottom). Arrow indicates cell of interest.

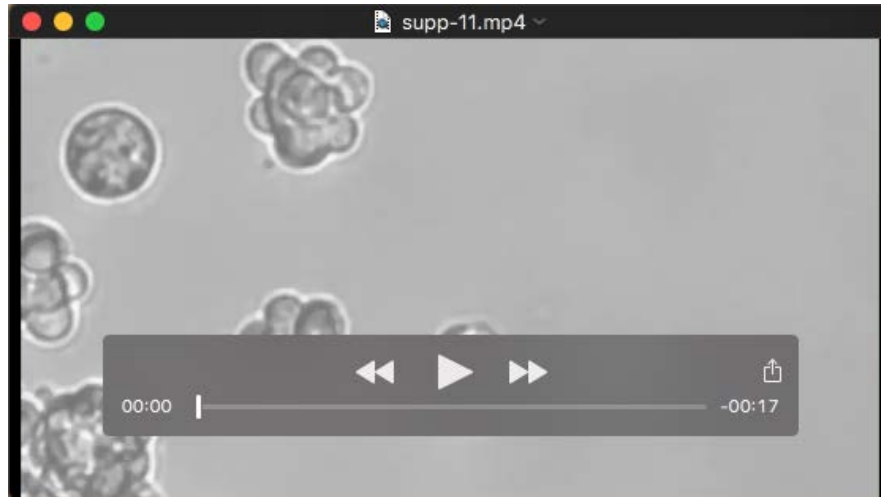

**Movie 9. Formation of nascent vesicle.** It is shown how 3 vacuolated cells that are in contact produce a single lumen from the vacuoles. This movie is related to Fig. S3F (top). The arrow indicates the microaggregate of interest.

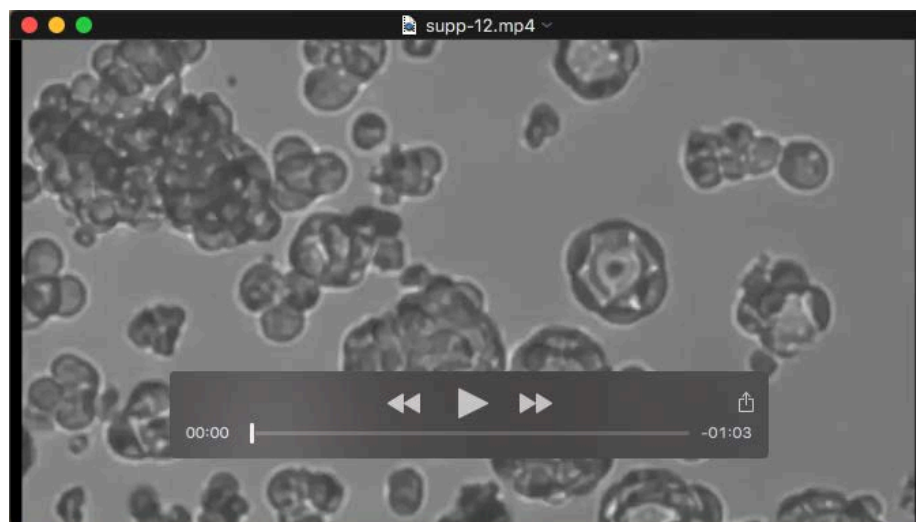

**Movie 10. Expansion of vesicle.** The movie shows how, starting from the 3-cell stage, the vesicle is expanding in size and cell number. This movie is related to Fig. S3F (bottom). The arrow indicates the vesicle of interest.
